# Supplementary material for: Phylogenomic analysis of cytochrome P450 multigene family and their differential expression analysis in Solanum lycopersicum L. suggested tissue specific promoters
Source: BMC Genomics. 2019 Feb 7;20:116. doi: 10.1186/s12864-019-5483-x (PMC6367802; doi:10.1186/s12864-019-5483-x)
Supplement: Supplementary file 4 — Intron analysis summary. Data for Intron map constructions and distribution. (XLSX 34 kb) [file 12864_2019_5483_MOESM4_ESM.xlsx]

## Sheet: intron map data
Sr.No.	soly ID	Name	Phylogenetic group	CDS(bp)	Amino acids	No. of exons	No.of Intron	Intron phase(s)	POS.of 1st intron in protein	pos.of 2nd intron in protein	INSERTION SITES
											I1	I2	I3	I4	I5	I6	I7	I8	I9	I10	I11	I12	I13	I14	I15	I16	I17	I18	I19	I20	I21	I22
1	Solyc01g008110.2.1	CYP51G1	51	1464	487	2	1	1	155.333	_					1
2	Solyc01g008670.2.1	CYP71D184	71	1488	495	2	1	1	288.667	_												1
3	Solyc01g008650.2.1	CYP71D185	71	1515	504	2	1	1	298.333	_													1
4	Solyc01g008640.2.1	CYP71D186	71	1482	493	2	1	1	291.333	_													1
5	Solyc02g062030.1.1	CYP71D187	71	1512	503	2	1	1	300.333	_													1
6	Solyc04g083140.1.1	CYP71D190	71	1506	501	2	1	1	298.333	_													1
7	Solyc06g060190.2.1	CYP71D204	71	1512	503	2	1	1	295.333	_													1
8	Solyc06g066240.2.1	CYP71D205	71	1542	513	2	1	1	307.333	_													1
9	Solyc06g066230.2.1	CYP71D206	71	1515	504	2	1	1	297.333	_													1
10	Solyc07g007460.1.1	CYP71D207	71	1455	484	3	2	0,2	168	283.667							1
11	Solyc07g052370.2.1	CYP71D208	71	1515	504	2	1	1	296.333	_													1
12	Solyc08g074260.2.1	CYP71D209	71	1515	504	2	1	1	299.333	_													1
13	Solyc08g076250.1.1	CYP71D211	71	1500	499	2	1	1	297.333	_													1
14	Solyc10g087010.1.1	CYP71D216	71	1533	510	2	1	1	304.333	_													1
15	Solyc10g087030.1.1	CYP71D219	71	1536	511	2	1	1	304.333	_													1
16	Solyc10g084590.2.1	CYP71D220	71	1530	509	2	1	1	304.333	_													1
17	Solyc11g007980.1.1	CYP71D221	71	1527	508	3	2	2,0	122.667	308			1											1
18	Solyc06g076160.2.1	CYP71AH9	71	1515	504	3	2	2,1	121.667	303.333			1										1
19	Solyc09g092560.2.1	CYP71AT13	71	1359	452	3	2	0,2	211	252.667									1		1
20	Solyc09g092580.2.1	CYP71AT15	71	1509	502	2	1	0	296.333	_													1
21	Solyc09g092590.1.1	CYP71AT16	71	1494	497	3	2	1,2	295.333	444.667													1
22	Solyc09g092600.2.1	CYP71AT17	71	1488	495	3	2	1,2	293.333	442.667													1
23	Solyc09g092620.2.1	CYP71AT19	71	1491	496	2	1	1	294.333	_													1
24	Solyc09g092640.2.1	CYP71AT21	71	1476	491	2	1	1	289.333	_
25	Solyc09g092670.2.1	CYP71AT23	71	1491	496	2	1	1	294.333	_													1
26	Solyc01g010490.2.1	CYP71AT24	71	1515	504	2	1	1	296.333	_													1
27	Solyc11g006590.1.1	CYP71AT27	71	1494	497	2	1	1	295.333	_													1
28	Solyc03g111880.2.1	CYP71AU33	71	1569	522	2	1	1	318.333	_														1
29	Solyc03g112010.2.1	CYP71AX3	71	1497	498	2	1	1	298.333	_													1
30	Solyc03g111990.2.1	CYP71AX5	71	1518	505	2	1	1	302.333	_													1
31	Solyc03g111970.2.1	CYP71AX7	71	1521	506	2	1	1	303.333	_													1
32	Solyc03g111950.2.1	CYP71AX9	71	1497	498	2	1	1	298.333	_													1
33	Solyc03g111940.2.1	CYP71AX10	71	1506	501	2	1	1	296.333	_													1
34	Solyc03g111930.2.1	CYP71AX11	71	1491	496	2	1	1	296.333	_													1
35	Solyc03g111920.1.1	CYP71AX12	71	1482	493	2	1	1	296.333	_													1
36	Solyc02g092250.2.1	CYP71BE17	71	1512	503	2	1	1	298.333	_													1
37	Solyc10g017510.2.1	CYP71BE18	71	1542	513	2	1	1	302.333	_													1
38	Solyc09g014900.2.1	CYP71BG2	71	1488	495	2	1	1	292.333	_													1
39	Solyc02g082070.2.1	CYP71BL1	71	1515	504	3	2	2,0	212.667	299								1					1
40	Solyc08g005650.2.1	CYP71BN1	71	1521	506	2	1	1	297.333	_													1
41	Solyc09g066400.1.1	CYP71BP1	71	1509	502	2	1	1	297.333	_													1
42	Solyc09g066370.1.1	CYP71BP2	71	1509	502	2	1	1	297.333	_													1
43	Solyc05g047530.2.1	CYP73A69	73	1587	528	2	1	0	283	_													1
44	Solyc07g049690.2.1	CYP74B3	74	1431	476	2	1	1	130.333	_
45	Solyc01g109150.2.1	CYP74C4	74	1485	494	3	2	2,1	294.667	462.333													1								1
46	Solyc01g109160.2.1	CYP74C27	74	1467	488	3	2	2,1	288.667	456.333																					1
47	Solyc01g109140.2.1	CYP74D1	74	1437	478	2	1	0	296	_													1
48	Solyc11g066580.1.1	CYP75A31	75	1536	511	3	2	2,1	109.667	304.333			1										1
49	Solyc03g115220.2.1	CYP75B49	75	1545	514	3	2	2,1	150.333	304.333					1
50	Solyc09g008910.1.1	CYP76A19	76	1524	507	2	1	1	304.333	_													1
51	Solyc10g083700.2.1	CYP76A21	76	1557	518	2	1	1	301.333	_													1
52	Solyc10g085500.1.1	CYP76A22	76	1524	507	2	1	1	302.333	_													1
53	Solyc10g083690.2.1	CYP76A6	76	1500	499	2	1	1	298.333	_													1
54	Solyc09g098010.2.1	CYP76B11P	76	1563	520	3	2	1,1	225.333	322.333										1					1
55	Solyc09g098770.1.1	CYP76B12	76	1491	496	3	2	1,2	295.333	392.667													1						1
56	Solyc09g098030.2.1	CYP76B13	76	1485	494	3	2	1,0	293.333	391													1						1
57	Solyc02g065190.2.1	CYP76B17	76	1476	491	3	2	2,0	135.667	293				1									1
58	Solyc02g065210.2.1	CYP76B18	76	1479	492	3	2	2,0	136.667	294				1									1
59	Solyc02g065220.2.1	CYP76B19	76	1479	492	3	2	2,0	136.667	294				1									1
60	Solyc02g090290.2.1	CYP76B23	76	1503	500	3	2	2, 1	150.667	303.333						1							1
61	Solyc02g090300.2.1	CYP76B24	76	1488	495	3	2	0,0	147	298					1								1
62	Solyc02g090350.2.1	CYP76B26	76	1497	498	3	2	0,0	151	300					1								1
63	Solyc09g098610.1.1	CYP76B30	76	1509	502	2	1	1	303.333	_													1
64	Solyc06g066280.2.1	CYP76Y5	76	1473	490	2	1	1	285.333	_
65	Solyc06g066270.1.1	CYP76Y6	76	1491	496	2	1	1	293.333	_													1
66	Solyc06g084820.1.1	CYP76Y8	76	1485	494	2	1	1	291.333	_													1
67	Solyc05g055400.2.1	CYP77A19	77	1536	511	2	1	2	294.667	_													1
68	Solyc11g007540.1.1	CYP77A20	77	1512	503	2	1	2	285.667	_
69	Solyc02g080330.2.1	CYP77B11	77	1527	508	2	1	1	252.333	_											1
70	Solyc01g096280.1.1	CYP78A74	78	1617	538	2	1	1	330.333	_																1
71	Solyc03g114940.2.1	CYP78A75	78	1551	516	2	1	1	315.333	_														1
72	Solyc05g047680.2.1	CYP78A77	78	1596	531	2	1	1	323.333	_																1
73	Solyc10g009310.2.1	CYP78A78	78	1578	525	2	1	1	317.333	_															1
74	Solyc12g056810.1.1	CYP78A79	78	1611	536	2	1	1	329.333	_																1
75	Solyc08g083450.1.1	CYP79A32	79	1569	522	2	1	1	310.333	_															1
76	Solyc04g025410.1.1	CYP79A43	79	1581	526	2	1	1	315.333	_															1
77	Solyc04g005370.2.1	CYP79A46	79	1581	526	2	1	1	315.333	_														1
78	Solyc04g005360.1.1	CYP79A47	79	1566	521	2	1	1	313.333	_														1
79	Solyc12g005170.1.1	CYP79A52	79	1581	526	2	1	1	312.333	_														1
80	Solyc08g080380.2.1	CYP80E6	80	1491	496	2	1	1	294.333	_														1
81	Solyc08g080390.2.1	CYP80E7	80	1446	481	2	1	1	279.333	_												1
82	Solyc06g035760.2.1	CYP80F3	80	1497	498	2	1	1	294.333	_													1
83	Solyc03g026140.2.1	CYP80M1	80	1461	486	2	1	1	287.333	_
84	Solyc03g026130.2.1	CYP80M2	80	1461	486	2	1	1	287.333	_
85	Solyc04g078290.2.1	CYP81B39	81	1539	512	3	2	0,1	192	309.333								1						1
86	Solyc04g078270.2.1	CYP81B40	81	1542	513	2	1	1	306.333	_														1
87	Solyc04g078340.2.1	CYP81C9	81	1563	520	2	1	1	311.333	_														1
88	Solyc04g078370.2.1	CYP81C10	81	1524	507	3	2	1 ,0	101.667	302		1											1
89	Solyc07g014670.2.1	CYP81C11	81	1539	512	2	1	1	305.333	_													1
90	Solyc02g064850.1.1	CYP81Q30	81	1476	491	2	1	1	290.333	_													1
91	Solyc02g092860.2.1	CYP81Q31	81	1503	500	2	1	1	295.333	_
92	Solyc04g078360.1.1	CYP81Y1	81	1455	484	2	1	1	281.333	_
93	Solyc12g088970.1.1	CYP82C22	82	1584	527	3	2	0,1	173	323.333						1										1
94	Solyc04g079640.2.1	CYP82D36	82	1560	519	2	1	1	312.333	_														1
95	Solyc04g079660.2.1	CYP82D38	82	1560	519	2	1	1	312.333	_														1
96	Solyc04g079680.2.1	CYP82D40	82	1563	520	2	1	1	313.333	_														1
97	Solyc04g007940.2.1	CYP82E11	82	1593	530	2	1	1	322.333	_																1
98	Solyc10g039210.2.1	CYP82M2	82	1566	521	2	1	1	313.333	_														1
99	Solyc10g081550.1.1	CYP82M3	82	1575	524	2	1	1	316.333	_														1
100	Solyc09g059240.2.1	CYP82U1	82	1557	518	2	1	1	308.333	_														1
101	Solyc06g073570.2.1	CYP82W1	82	1632	543	3	2	1,2	224.333	339.667									1								1
102	Solyc02g084570.2.1	CYP84A2	84	1566	521	3	2	1,1	99.3333	317.333		1												1
103	Solyc06g076800.2.1	CYP86A33	86	1566	521	2	1	0	100	_		1
104	Solyc02g014730.2.1	CYP86B11	86	1674	557	2	1	1	422.333	_																				1
105	Solyc03g096990.2.1	CYP89A72	89	1641	546	2	1	1	516.333	_																						1
106	Solyc03g122350.2.1	CYP92A50	92	1527	508	2	1	1	299.333	_													1
107	Solyc03g122360.2.1	CYP92A51	92	1521	506	2	1	1	297.333	_													1
108	Solyc04g071780.2.1	CYP92B5	92	1521	506	2	1	1	299.333	_													1
109	Solyc04g071790.1.1	CYP92B6	92	1533	510	2	1	1	303.333	_													1
110	Solyc04g071800.2.1	CYP92B7	92	1530	509	2	1	1	302.333	_													1
111	Solyc04g071820.2.1	CYP92B9	92	1515	504	2	1	1	297.333	_													1
112	Solyc11g030730.1.1	CYP92B14	92	1506	501	2	1	1	291.333	_													1
113	Solyc01g010260.2.1	CYP93A42	93	1560	519	2	1	1	301.333	_													1
114	Solyc10g078280.2.1	CYP94D34	94	1482	493	2	1	1	145.333	_					1
115	Solyc10g078240.1.1	CYP98A51	98	1530	509	3	2	2,1	162.667	295.333						1							1
116	Solyc10g078230.1.1	CYP98A52	98	1530	509	3	2	2,1	162.667	295.333						1							1
117	Solyc10g078220.1.1	CYP98A53	98	1521	506	3	2	2,1	162.667	295.333						1							1
118	Solyc10g009390.2.1	CYP703A13	703	1671	556	3	2	1 ,1	90.3333	330.333	1														1
119	Solyc08g079280.2.1	CYP706C12	706	1575	524	2	1	1	318.333	_															1
120	Solyc08g079300.2.1	CYP706C14	706	1599	532	2	1	1	326.333	_														1
121	Solyc08g079310.2.1	CYP706C15	706	1548	515	2	2	1	309.333	_														1
122	Solyc08g079330.1.1	CYP706C17	706	1566	521	2	1	1	315.333	_														1
123	Solyc08g083410.1.1	CYP706C18	706	1566	521	2	1	1	315.333	_														1
124	Solyc08g083520.1.1	CYP706C19	706	1572	523	2	1	1	317.333	_														1
125	Solyc08g079350.1.1	CYP706C20	706	1572	523	2	1	1	317.333	_														1
126	Solyc08g079370.1.1	CYP706C22	706	1566	521	2	1	1	315.333	_														1
127	Solyc08g083510.1.1	CYP706C23	706	1566	521	2	1	1	315.333	_														1
128	Solyc08g083500.1.1	CYP706C24	706	1566	521	2	1	1	315.333	_														1
129	Solyc08g079420.2.1	CYP706G5	706	1539	512	2	1	1	304.333	_													1
130	Solyc10g018150.1.1	CYP712G1	712	1575	524	2	1	1	304.333	_													1
131	Solyc06g065420.1.1	CYP716A42	716	1428	475	3	2	2,0	313.667	380																		1
132	Solyc06g065430.2.1	CYP716A43	716	1428	475	3	2	2,0	314.667	381																		1
133	Solyc05g021390.2.1	CYP716A44	716	1431	476	3	2	2,0	312.667	379																		1
134	Solyc07g042880.1.1	CYP716A46	716	1449	482	3	2	2,0	318.667	385																		1
135	Solyc02g069600.2.1	CYP716C6	716	1410	469	3	2	2,0	307.667	374																		1
136	Solyc11g056670.1.1	CYP716H1	716	1434	477	3	2	2,0	315.667	382															1			1
137	Solyc07g055970.1.1	CYP718A6	718	1482	493	3	2	2,0	333.667	400																1			1
138	Solyc04g011680.1.1	CYP736A59	736	1500	499	2	1	1	295.333	_													1
139	Solyc04g011690.2.1	CYP736A60	736	1506	501	2	1	1	296.333	_													1
140	Solyc04g050620.2.1	CYP736A61	736	1485	494	2	1	1	291.333	_													1
141	Solyc04g054220.2.1	CYP736A69	736	1485	494	2	1	1	289.333	_													1
142	Solyc04g054250.2.1	CYP736A67	736	1479	492	2	1	1	288.333	_													1
143	Solyc04g054260.2.1	CYP736A68	736	1503	500	2	1	1	297.333	_													1
144	Solyc04g083150.1.1	CYP736A72	736	1509	502	2	1	1	229.333	_													1
145	Solyc12g042480.1.1	CYP736A74	736	1491	496	2	1	1	292.333	_													1

## Sheet: intron distribution graph
intron less	23	9.87124
1 intron	108	46.3519	62.2318
2 intron	37	15.8798
3 intron	4	1.71674
4 intron	30	12.8755
5 & more	31	13.3047
		100
	233
